# Supplementary material for: Hypokalemia Promotes Arrhythmia by Distinct Mechanisms in Atrial and Ventricular Myocytes
Source: PubMed Central journal article supplement — Circ Res. 2020 Mar 26;126(7):889–906. doi: 10.1161/CIRCRESAHA.119.315641 (PMC7098435; doi:10.1161/circresaha.119.315641), 2020-03-26
Supplement: res-126-889-s001.pdf [file res-126-889-s001.pdf]

## SUPPLEMENTARY MATERIAL

### Hypokalemia promotes arrhythmia by distinct mechanisms in atrial and ventricular myocytes

Kiarash Tazmini,<sup>1,2\*</sup> Michael Frisk,<sup>1,3\*</sup> Alexandre Lewalle,<sup>4</sup> Martin Laasmaa,<sup>1,3</sup> Stefano Morotti,<sup>5</sup> David B. Lipsett,<sup>1</sup> Ornella Manfra,<sup>1,3</sup> Jonas Skogested,<sup>1</sup> Jan M. Aronsen,<sup>1,6</sup> Ole M. Sejersted,<sup>1</sup> Ivar Sjaastad,<sup>1,3</sup> Andrew G. Edwards,<sup>5</sup> Eleonora Grandi,<sup>5</sup> Steven A. Niederer,<sup>4</sup> Erik Øie,<sup>2</sup> and William E. Louch<sup>1,3</sup>

<sup>1</sup> Institute for Experimental Medical Research, Oslo University Hospital and University of Oslo, Oslo, Norway

<sup>2</sup> Department of Internal Medicine, Diakonhjemmet Hospital, Oslo, Norway

<sup>3</sup> KG Jebsen Center for Cardiac Research, University of Oslo, Oslo, Norway

<sup>4</sup> Division of Imaging Sciences and Biomedical Engineering, King's College London, London, UK

<sup>5</sup> Department of Pharmacology, School of Medicine, University of California Davis, Davis, CA, USA

<sup>6</sup> Bjørknes College, Oslo, Norway

\* These authors contributed equally to this manuscript

## EXPANDED METHODS

### Ethical approval

This study was approved by the Norwegian Animal Research Authority (FDU application number 7786) under the Norwegian Animal Welfare Act, and conformed with Directive 2010/63/EU of the European Parliament.

### Isolation of ventricular cardiomyocytes

Male Wistar rats (~10 weeks old and ~300 g) were housed in a temperature-regulated room with 12 h day/12 h night cycling, and free access to food and water. Rats were sedated with a mixture of 5% isoflurane and 95% O<sub>2</sub>, and sacrificed by cervical dislocation. Excised hearts were placed in cool, oxygenated buffer solution containing (in mM): NaCl 130, KCl 5.4, MgCl<sub>2</sub> 0.5, NaH<sub>2</sub>PO<sub>4</sub> 0.4, HEPES 25, D-glucose 5.5, pH=7.4 with NaOH, and ~ 5000 IU heparin. The excised heart was rapidly cannulated and mounted on a Langendorff setup, and retrogradely perfused through the aorta with the oxygenated buffer solution described above at 37°C. When the heart was cleared of blood, the perfusion was switched to buffer solution supplemented with 200 U/ml collagenase type II (Worthington Biochemical, Lakewood, NJ, USA) and 0.04 mM Ca<sup>2+</sup> for 18-20 min. The right and left atria were then carefully excised and stored in cold buffer for further digestion and isolation of atrial cardiomyocytes (see

below). The left ventricle was cut down, minced, and gently triturated with a cutoff Pasteur pipette for ~1 min in collagenase-free buffer containing 1% bovine serum albumin (BSA) (Sigma Aldrich, St. Louis, MO, USA) and ~0.02 U/ml deoxyribonuclease I (Worthington Biochemical Corporation, Lakewood, NJ, USA). The cell-containing solution was then filtered through 200- $\mu$ m nylon mesh, and  $\text{Ca}^{2+}$  concentration was progressively increased (0.1, 0.2, and 0.5 mM). The isolated ventricular myocytes were stored at room temperature and used in experiments within 10 h of isolation.

### **Isolation of atrial cardiomyocytes**

A secondary digestion of the excised atria was performed as previously described.<sup>12</sup> Each atrium was cut into small pieces (~1 mm<sup>3</sup>) with a sharp razor blade, and gently agitated in a spinner-bottle containing (in mM): NaCl 100, KCl 10, MgSO<sub>4</sub> 5, KH<sub>2</sub>PO<sub>4</sub> 1, CaCl<sub>2</sub> 0.02, Hepes 5, D-glucose 20, Taurin10, 0.5 % BSA, and pH =7.4. 400 U/mL of collagenase type II (Worthington Biochemical Corporation) was added to facilitate further digestion. After 20 min, the tissue chunks were washed with clean solution, and gently triturated with a Pasteur pipette for ~2 min with addition of ~0.02 U/mL deoxyribonuclease I (Worthington Biochemical). The isolated atrial myocytes were then filtered through 200- $\mu$ m nylon mesh, sedimented, and washed with clean buffer containing increasing  $\text{Ca}^{2+}$  concentrations (0.1, 0.2, and 0.5 mM). Right and left atria myocytes were maintained separately at room temperature, and studied within 10 h of isolation.

### **Recordings of $\text{Ca}^{2+}$ transients and waves**

$\text{Ca}^{2+}$  transients were recorded in isolated atrial and ventricular myocytes loaded with 20  $\mu$ M fluo-4 AM (Molecular Probes, Eugene, OR, USA) for 10 min. Cells were plated on laminin-coated coverslips, and placed in a superfusion chamber mounted on an inverted microscope. Characterization of whole-cell  $\text{Ca}^{2+}$  transients was performed in cells which were field-stimulated at 1 Hz through two platinum electrodes with 3 ms biphasic pulses, 25% above threshold. Fluo-4 was excited at 485 nm and emitted light >510 nm was registered with a photomultiplier tube (Photon Technology International, Monmouth Junction, NJ, USA).  $\text{Ca}^{2+}$  transients were recorded during an initial 2 min control period, when myocytes were superfused at 37°C with a solution containing (in mM): NaCl 140, KCl 5.0, MgCl<sub>2</sub> 0.5, NaH<sub>2</sub>PO<sub>4</sub> 0.4, CaCl<sub>2</sub> 1.0, Hepes 5, D-glucose 5.5, pH adjusted to 7.4 with NaOH. Hypokalemia was then simulated by rapidly reducing  $[\text{K}^+]_o$  from 5.0 mM to 2.7 mM via a

rapid-solution changer for the ensuing 3 min. This protocol was conducted for only one cardiomyocyte per plate.

In follow-up experiments, the incidence of  $\text{Ca}^{2+}$  waves was investigated during a 30 s pause in the stimulation, performed after 2 min of stable  $\text{Ca}^{2+}$  transient recordings in  $[\text{K}^+]_o = 5.0$  mM, and then again after 3 min in  $[\text{K}^+]_o = 2.7$  mM.

SR  $\text{Ca}^{2+}$  content was estimated by rapid application of 10 mM caffeine (Sigma-Aldrich), and measuring the magnitude of the resulting  $\text{Ca}^{2+}$  transient.  $\text{Ca}^{2+}$  transients elicited by 1 Hz field stimulation during continuous caffeine superfusion were employed to examine rates of  $\text{Ca}^{2+}$  extrusion, using exponential fits of the decay phase of each transient.<sup>16</sup>

In a subset of experiments,  $\text{Ca}^{2+}$  transients were examined with inclusion of 0.3  $\mu\text{mol/L}$  ouabain (Sigma-Aldrich) in the normokalemic and hypokalemic solutions, to allow preferential inhibition of the  $\alpha 2$  NKA isoform.<sup>19</sup>

Recordings of  $\text{Ca}^{2+}$  transients, waves, and caffeine responses were analyzed with Clampfit 9.0 (Axon Instruments, Foster City, CA, USA).  $\text{Ca}^{2+}$  transient magnitudes are presented as peak fluorescence values normalized to resting fluorescence ( $F/F_0$ ). Representative recordings were smoothed with a moving average or Savitzky-Golay filter in TableCurve 2D (Systat Software Inc, Chicago, USA).

### **T-tubule imaging in isolated cardiomyocytes**

Initial quantification of t-tubule structure in isolated ventricular and atrial myocytes was performed by staining cells with 10  $\mu\text{mol/L}$  di-8-ANEPPS (Invitrogen, Paisley, UK) for 20 min. Plated cells were then scanned longitudinally along their central axis, using a confocal microscope (LSM 710, Zeiss, Jena, Germany, pinhole=0.9  $\mu\text{m}$ ) with a 60x objective. Di-8-ANEPPS was excited at 488 nm, and emission was measured above 510 nm. 2048 $\times$ 2048 pixel images were deconvolved using Huygens Essential software (Scientific Volume Imaging, Hilversum, The Netherlands), and a point spread function calculated from images of 100 nm-diameter fluorescent beads (Microprobes, Gaithersburg, MD). For each cell, t-tubule density was determined by thresholding the image intensity of the entire cell by the Otsu method, using an automated algorithm in ImageJ (National Institutes of Health). The t-index<sup>17</sup> was then calculated for the myocyte interior, defined as the percentage of the cellular cross-

sectional area, excluding the nucleus, occupied by above-threshold pixels. Cells exhibiting a t-index of  $\geq 2\%$  were defined as being tubulated, which roughly corresponds to the level detectable by eye.<sup>12</sup>

In follow-up experiments, t-tubule labeling was paired with  $\text{Ca}^{2+}$  imaging and/or electrophysiological measurements. T-tubules were stained with di-8-ANEPPS, as above, or with CellMask Orange (1:1000 dilution; Thermo Fisher Scientific, Waltham, MA, USA; C10045) for 10 min. CellMask Orange was excited at 546 nm, and emission was measured above 560 nm. Confocal images were obtained with an LSM 510 confocal microscope (Zeiss), with a 40x objective and pinhole set to 1 Airy unit (80  $\mu\text{m}$ ).

### **Monitoring of intracellular $\text{Na}^+$**

Intracellular  $\text{Na}^+$  levels were assessed in myocytes loaded with SBFI AM (Thermo Fischer) and 0.15% Pluronic F-127 for 45 min.<sup>16, 19</sup> Cardiomyocytes were field stimulated and superfused with the same normokalemic and hypokalemic solutions as used in the fluo-4 experiments (1 Hz pacing, 37°C). The sensitivity of SBFI to detect changes in intracellular  $[\text{Na}^+]$  was examined by permeabilizing ventricular cardiomyocytes with 2  $\mu\text{g}/\text{mol}$  monensin and 30  $\mu\text{mol}/\text{L}$  gramicidin (both Sigma-Aldrich),<sup>16, 19</sup> and then perfusing with progressively increasing  $\text{Na}^+$  concentrations spanning the physiological range. SBFI was excited at 340 nm and emission measured at 410 and 590 nm. Results are presented as an emission ratio (410/590).

### **Detubulation**

Ventricular cardiomyocytes were detubulated using a protocol similar to that described by Kawai *et al.*<sup>18</sup> Myocytes were added to a HEPES Tyrodes solution containing (in mM): NaCl 140.0, KCl 5.4,  $\text{MgCl}_2$  0.5,  $\text{NaH}_2\text{PO}_4$  0.4, HEPES 5.0, D-Glucose 5.5,  $\text{CaCl}_2$  1.0, pH 7.4 with NaOH. Osmotic shock was induced by adding 1.5 mM formamide (Sigma-Aldrich, F5786), and placing the cell suspension on a shaker for 15 min at room temperature. The cells were then pelleted by centrifugation at 500 rpm for 30 s, and resuspended in HEPES Tyrodes solution to remove the formamide. After 5 min of incubation on a cell shaker (5 min, room temperature), cells were washed once more by centrifugation and resuspension. Successful detubulation was verified by di-8-ANEPPS staining and confocal imaging, as above.  $\text{Ca}^{2+}$  transients were then examined by wide-field fluo-4 fluorescence during 1 Hz field stimulation, as described.

### **Fixation, immunocytochemistry, and imaging of isolated myocytes**

8-well LAB-TEK® chambered coverglasses (Thermo Fisher; 155411) were coated with 0.01% poly-L lysine solution (Sigma-Aldrich) for 15 min at room temperature, followed by coating overnight with 10 µg/ml natural mouse laminin (Thermo Fisher) in Medium 199 (Thermo Fisher). Isolated adult cardiomyocytes were seeded on coated coverglasses for 30-45 min, prior to fixation with 4% paraformaldehyde in ventricular myocyte isolation buffer (see above) for 5 min at room temperature. Cells were subsequently washed with PBS and fixation was quenched with 100 mM glycine solution in PBS. Membranes were permeabilized with 0.5% Triton X-100 (Sigma-Aldrich) in PBS and non-specific antigens were blocked by incubating in a solution containing 15.1 mM NaCl, 1.75 mM Na<sub>3</sub>C<sub>6</sub>H<sub>5</sub>O<sub>7</sub>, 5% normal goat serum, 3% BSA and 0.02% NaN<sub>3</sub> for 2 h at room temperature. Primary and secondary antibodies were diluted in a solution containing 15.1 mM NaCl, 1.75 mM Na<sub>3</sub>C<sub>6</sub>H<sub>5</sub>O<sub>7</sub>, 2% normal goat serum, 1% BSA and 0.02% NaN<sub>3</sub> and applied to cells overnight at 4°C and for 2 h at room temperature, respectively. Cells were washed with PBS between most steps following fixation, but not prior to incubation with primary antibody. Finally, samples were mounted in ProLong® Diamond Antifade with DAPI and allowed to cure for 24 h at room temperature. The following antibodies were used at the indicated dilutions: NCX (Swant, R3F1, 1:100), NKA-α1 (Merck Millipore, 05-369, 1:100), NKA-α2 (Merck Millipore, 07-674, 1:100), F(ab')<sub>2</sub>-Goat anti-Mouse IgG (H+L) secondary antibody (Alexa Fluor 488, Thermo Fisher, A-11017, 1:200), and F(ab')<sub>2</sub>-goat anti-mouse IgG (H+L) secondary antibody (Alexa Fluor 546, Thermo Fisher, A-11071, 1:200).

All images were captured on an LSM-800 confocal microscope (Carl Zeiss AG, Oberkochen, Germany) equipped with a Plan-Apochromat 63x/1.4 oil immersion lens. Excitation and emission wavelengths were as follows: AF488 (493, 517), AF546 (557, 572). Image resolution was 4096 × 4096 pixels (pixel width 0.041 µm) with a pixel dwell time of 2.06 µs. The Airyscan modality was used for both image acquisition and post-processing.

### **Cryosectioning, fixation, and imaging of intact myocardium**

Rapidly excised ventricular and atrial tissue was positioned in a silicon mould containing Tissue Tek® O.C.T. compound (Sakura® Fintek, Torrance, CA, USA), and submerged in melting 2-methylbutane until frozen. Tissue blocks were trimmed into 10 µm sections at 20°C using a Cryo-Star HM 560 cryostat (Microm International GmbH, Dreieich, Germany).

Sections were transferred to Poly-Prep slides (Merck Life Science, Darmstadt, Germany) and fixed in 4% paraformaldehyde for 8 min at 14 °C. Paraformaldehyde activity was quenched with 100 mmol/L glycine in PBS, and sections were permeabilized with 0.5% Triton X-100 (Merck), both for 15 min at room temperature. Sections were washed with PBS between all steps. Subsequent antibody labelling and Airyscan imaging were performed as described above for isolated cardiomyocytes. T-tubules were labeled in intact cardiac tissue using caveolin-3 antibody (ab2912, Abcam, Cambridge, UK) at 1:100 dilution. For all employed immunolabels, imaging was performed with secondary antibodies alone to exclude the influence of non-specific fluorescence.

### **Patch-clamp experiments**

Both current- and voltage-clamp experiments were performed using 1-2 M $\Omega$  pipettes and an Axoclamp-2B amplifier (Axon Instruments, Foster City, CA, USA). pCLAMP software (Axon Instruments) was used to acquire and analyze data.

APs were recorded in bridge-mode, and elicited by 3 ms supra-threshold current steps at 1 Hz. Ca<sup>2+</sup> transients were simultaneously measured by loading cells with 20  $\mu$ M fluo-4 AM and recording confocal linescans (LSM 510 microscope, Zeiss), as described previously.<sup>47</sup> Initial AP characterization was performed with a pipette solution contained (in mM) 120 K-aspartate, 0.5 MgCl<sub>2</sub>, 6 NaCl, 10 HEPES, 10 glucose, 25 KCl, 4 K<sub>2</sub>-ATP, 1.9 CaCl<sub>2</sub>, 1.85 EGTA, and pH=7.2. Free [Ca<sup>2+</sup>] was calculated to be 10 nM by MaxChelator (<https://somapp.ucdmc.ucdavis.edu/pharmacology/bers/maxchelator/CaMgATPEGTA-TS.htm>). Cells observed to be electrically stable in control conditions were exposed to simulated hypokalemia by lowering extracellular [K<sup>+</sup>] from 5.0 to 2.7 mM. For examination of the effects of intracellular Ca<sup>2+</sup> buffering, EGTA concentration was set at 60  $\mu$ M and CaCl<sub>2</sub> was removed from the pipette solution. Effects of inhibition of ultra-rapid K<sup>+</sup> current (I<sub>Kur</sub>) on AP configuration were assessed during rapid application of 50  $\mu$ mol/L 4-aminopyridine (4-AP). This concentration has been previously shown to almost completely block I<sub>Kur</sub> while having minimal influence on other currents such as transient outward K<sup>+</sup> current (I<sub>TO</sub>).<sup>20, 21</sup> Effects of I<sub>Na</sub> inhibition were assessed by rapid application of 1  $\mu$ mol/L tetrodotoxin (TTX, Abcam),<sup>15</sup> and effects of triggered Ca<sup>2+</sup> release during the AP were blocked with 10 mM caffeine. All AP recordings were corrected for liquid junction potentials. AP duration was measured as time from the upstroke to 25, 50, and 75% repolarization (APD<sub>25</sub>, APD<sub>50</sub>,

APD<sub>75</sub>), and full duration was defined as repolarization to 5 mV above resting membrane potential. EADs were defined as positive voltage deflections during the downstroke of the action potential repolarization with a minimum amplitude of 2 mV. DADs were defined as minimum 2 mV depolarizing deflections from resting potential.

Membrane currents were recorded in discontinuous voltage-clamp, using a switching rate of 8 kHz. NKA currents were recorded based on a described protocol<sup>6</sup>, with a pipette solution containing (mM): Hepes 10, tetraethylammonium chloride 20, L-aspartate 42, EGTA 42, CaCl<sub>2</sub> 29.7, Na<sub>2</sub>phosphocreatine 5, MgATP 10, NaOH 40, pH=7.2 with CsOH. Cells were bathed in a solution containing (in mM): NaCl 147, MgCl<sub>2</sub> 2, EGTA 0.1, D-glucose 5.5, Hepes 5, BaCl<sub>2</sub> 2, nifedipine 0.001, KCl 5.0 *or* 2.7, pH=7.4 with NaOH, at 22°C. From a holding potential of -20 mV, NKA currents were elicited using hyperpolarizing voltage ramps from +70 to -120 mV, and defined as the reduction in current when extracellular K<sup>+</sup> was rapidly removed (Online Figure IA, B). Data were fit with a 5-parameter sigmoid.

K<sup>+</sup> currents were recorded with an intracellular solution containing (in mM): 120 K-aspartate, 0.5 MgCl<sub>2</sub>, 6 NaCl, 10 HEPES, 10 glucose, 25 KCl, 4 K<sub>2</sub>-ATP, 0.06 EGTA, pH=7.2. Extracellular solutions simulating normokalemic and hypokalemic conditions were as above, maintained at 22°C. Steady-state K<sup>+</sup> currents were measured at the end of 500 ms depolarizing voltage steps from -70 mV to a range of potentials (-120 mV to +60 mV, illustrated in Online Figure IIA). In further experiments, the contribution of I<sub>TO</sub> to steady-state current was inhibited using a 1 s inactivating voltage step from -70 mV to +50 mV. This was followed by a brief step back to holding potential current, and then a 100 ms test step to a range of potentials (-70 to +150 mV, illustrated in Online Figure IIIA, described in<sup>22</sup>). Previous work has shown that slow recovery of I<sub>to</sub> from inactivation at room temperature allows better isolation of I<sub>Kur</sub> in the steady-state current at the end of the test pulse.<sup>22, 42</sup>

NCX activity was examined using the tail current elicited by repolarization following a 100 ms voltage step from -45 to 0 mV (Online Figure V).<sup>48</sup> Each tail current was fit with a double exponential to obtain the second time constant ( $\tau_{\text{slow}}$ ), and these values were compared during perfusion with extracellular solutions simulating normo- and hypokalemic conditions, as above. L-type Ca<sup>2+</sup> currents elicited by the depolarizing step of this protocol were previously reported.<sup>6</sup>

Cellular capacitance was measured by integrating the current elicited by a voltage step from  $-70$  to  $-80$  mV. NKA and  $K^+$  currents are presented normalized to these values, in units of pA/pF.

### **Western blotting**

Western blotting was performed as previously described.<sup>24</sup> Briefly, homogenates of rat left atria and left ventricles were prepared in protein lysis buffer using a TissueLyserII (QIAGEN, Hilden, Germany), and centrifuged (4000 rpm, 10 min, 4 °C). The resultant supernatant was stored at  $-70$  °C. Total protein samples were run on Criterion™ TGXTM pre-cast gels, and transferred to 0.45  $\mu$ m PVDF membranes (both from Bio-Rad Laboratories, Inc., Hercules, CA, USA). Blots were blocked in non-fat dairy milk in TBS-T and incubated overnight with primary antibody (anti-Kv1.5, APC-004, Alomone, Jerusalem, Israel) with a 1:1000 dilution at 4°C. Blots were then incubated with anti-rabbit horseradish peroxidase-conjugated secondary antibody for 1 h at room temperature, developed with ECL prime (Amersham/GE HealthCare, Buckinghamshire, UK), and visualized on a LAS-4000 (Fujifilm, Tokyo, Japan). Image processing and signal quantification were performed in ImageQuant TL (v2003.03; RRID:SCR\_014246) and ImageJ (RRID:SCR\_003070), respectively.

### **PCR analyses**

qPCR was performed as described in<sup>23</sup>. Frozen rat right atrial and left ventricular homogenates were defrosted and mRNA was extracted using an RNeasy Mini Kit (Qiagen, Hilden, Germany). qPCR was then performed with TaqMan assays (Applied Biosystems, Foster City, CA) to quantify expression of KCNA5 (Rn00564245\_s1 75rxns, ThermoFisher Scientific, Waitham, MA, USA), normalised to the expression of the housekeeping gene Gapdh (Rn99999916\_s1, ThermoFisher).

### **Mathematical modelling**

A computational simulation of the time-dependent effects of hypokalemia on  $Na^+$  and  $Ca^{2+}$  homeostasis was performed by adapting the model of Terkildsen *et al.*,<sup>25</sup> wherein a set of ordinary differential equations describes the electrophysiology of the rat cardiomyocyte. For the purpose of this study, crosstalk between NCX and NKA activity was simulated by including a new dimensionless parameter  $NCX_{rev}$  to scale the intracellular  $Na^+$  concentration ( $Na_i$ ) sensed by the exchanger:



$$I_{NCX} = \frac{g_{NCX} (NCX_{rev} \times e^{\eta FV/(RT)} Na_i^3 Ca_o - e^{(\eta-1)FV/(RT)} Na_o^3 Ca_i)}{(Na_o^3 + K_{mNa}^3)(Ca_o + K_{mCa})(1 + k_{sat} e^{(\eta-1)FV/(RT)})}$$

Increasing  $NCX_{rev}$  thus effectively augmented the proportion of exchanger activity operating in reverse mode, as expected when NCX is localized closer to NKA and higher local  $Na^+$  levels. Sensitivity analyses were also performed to examine the effects of altered activity of individual ion channels/exchangers: the sodium channel ( $g_{Na}$ ), sodium-calcium exchanger ( $g_{NCX}$ ), and sodium-potassium pump ( $I_{NaKmax}$ ) currents, and the number of L-type  $Ca^{2+}$  channel-RyR units. In each case, the prefactor for each ion flux was varied by +/- 5%. The model equations were encoded in the CellML 1.0 standard (<https://www.cellml.org>) and solved by the Newton method using the CVODE integrator on the Cellular Open Resource platform (COR, version 0.9.31.1409; <http://cor.physiol.ox.ac.uk>) on a standard desktop computer (16GB, 3.40GHz x 8 processor). Hypokalemia experiments were simulated by instantaneously changing extracellular  $[K^+]$  from 5.0 to 2.7 mM. After each modification of the model, steady state was reached by integrating the model equations over 10,000 beats, where the amplitude of the AP became constant typically to within  $2e^{-4}\%$ . The simulation outputs were then analysed in Matlab (R2014b, MathWorks, Natick, MA).

Computational analysis of atrial myocyte electrophysiology was performed using our established human atrial cell model,<sup>26</sup> recently updated with a Markov model of  $Na^+$  current.<sup>14</sup> Experimental voltage recordings were used as inputs in AP-clamp simulations to reveal underlying dynamics of  $Na^+$ ,  $Ca^{2+}$ , and NCX currents. In some simulations, the AP was interrupted at the EAD take-off potential and a voltage step to -30 mV was applied to estimate  $I_{Na}$  availability. Further modeling tested effects of varying  $-dV/dt$  during the repolarizing phase of the AP, and the influence of membrane hyperpolarization during hypokalemia. The simulations were performed in Matlab using the stiff ordinary differential equation solver ode15s. Model code is available for download at:

<https://somapp.ucdmc.ucdavis.edu/Pharmacology/bers/> or  
<http://elegrandi.wixsite.com/grandilab/downloads>.

### Chemicals and reagents

Salts and solution constituents were purchased from Sigma-Aldrich unless stated otherwise. Di-8-ANNEPS (D3167) was dissolved in DMSO plus 20% pluronic acid F-127 (P-6867) (Molecular Probes). All solutions were made using ultrapure water supplied by Milli-Q system (Millipore).

## **Statistics**

All data were tested for normality of distribution using a Shapiro-Wilk test. Normally distributed data were compared with Student's *t*-test or ANOVA with Bonferroni correction for multiple comparisons, as appropriate. Non-normal distributions were examined with a Wilcoxon signed rank test, Mann-Whitney rank sum test, or Kruskal-Wallis analysis on ranks with Dunn's correction for multiple comparisons. Two-factor comparisons were performed with two-way ANOVA with Bonferroni correction; results of post-hoc comparisons are presented in the Online Tables. Differences in proportions were determined by z-test. *p* values < 0.05 were considered statistically significant. Outliers were defined as values > 3 S.D. from the mean, and excluded. All data were analyzed by Sigmaplot software (Systat Software), and are presented as mean ± SE.

We have not performed nested (mixed model) statistics to address potential differences in cardiomyocytes isolated from different hearts. This should be noted as a statistical weakness of the study. However, since we have employed only normal, inbred rats, it might be expected that differences in basic myocyte physiology between animals are minimal.

## ONLINE FIGURES

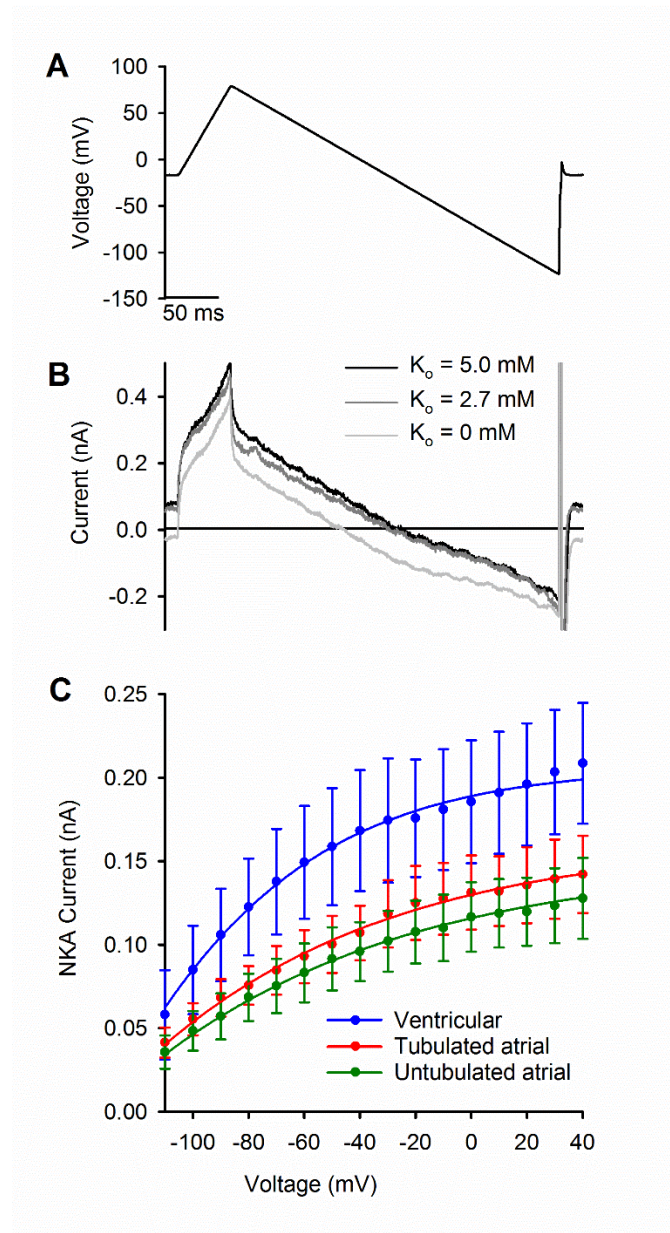

### Online Figure I. Recording of NKA currents.

**A.** NKA currents were measured using a previously described protocol,<sup>6</sup> with hyperpolarizing voltage ramps from +70 to -120 mV. **B.** NKA current was defined as the reduction in current when extracellular  $[K^+]$  was rapidly dropped from 5.0 or 2.7 mmol/L to 0. A recording from a representative tubulated atrial myocyte is illustrated. **C.** Mean unnormalized NKA currents under nomokalemic conditions in ventricular myocytes, tubulated, and untubulated atrial myocytes.  $n = 10, 7, 9$  cells from 4, 4, 5 hearts in ventricular, tubulated atrial, and untubulated atrial cells. **Statistics.** Two-way ANOVA test with Bonferroni correction. Tubulated and untubulated atrial myocyte curves were significantly different from ventricular myocytes (difference in means:  $p=4.41 \times 10^{-7}$ ,  $p=2.18 \times 10^{-12}$ , respectively; see Online Table I for full results).

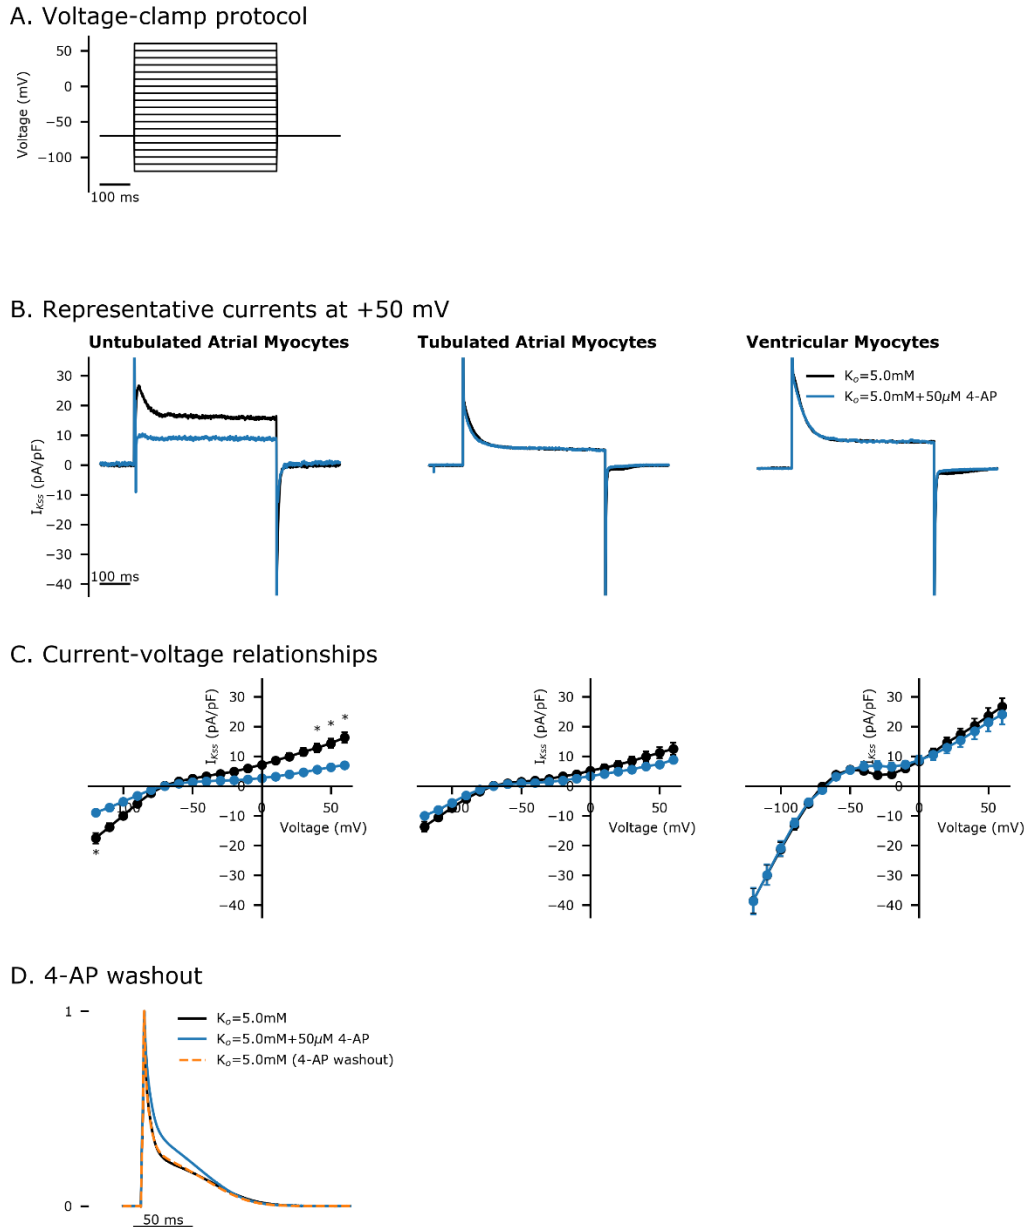

### Online Figure II. Recording of steady-state $K^+$ current.

**A.** Steady-state  $K^+$  currents were measured at the end of 500 ms depolarizing voltage steps from -70 mV to a range of potentials. Measured changes in steady-state currents during simulated hypokalemia are presented in Fig. 6E and 7F for ventricular and atrial myocytes, respectively. **B.** Treatment with 50  $\mu\text{mol/L}$  4-AP reduced steady-state currents only in untubulated atrial myocytes, indicating the presence of  $I_{K_{Kur}}$  exclusively in these cells. **C.** Mean current-voltage relationships in the presence and absence of 4-AP.  $K_o=5.0$ :  $n_{\text{cells}}$ ,  $n_{\text{hearts}}=46$ , 14 in untubulated atrial; 25, 12 in tubulated atrial; 21, 10 in ventricular myocytes.  $K_o=5.0+4\text{-AP}$ :  $n_{\text{cells}}$ ,  $n_{\text{hearts}}=8$ , 4 in untubulated atrial; 7, 5 in tubulated atrial; 8, 7 in ventricular myocytes. **D.** In agreement with inhibition of  $I_{K_{Kur}}$ , rapid application of 50  $\mu\text{M}$  4-AP also reversibly prolonged the AP plateau during  $K_o=5.0$  ( $n=4$  untubulated atrial cells). **Statistics.** Panel C: two-way ANOVA; \* =  $p<0.05$ . See Online Table VI for full results.

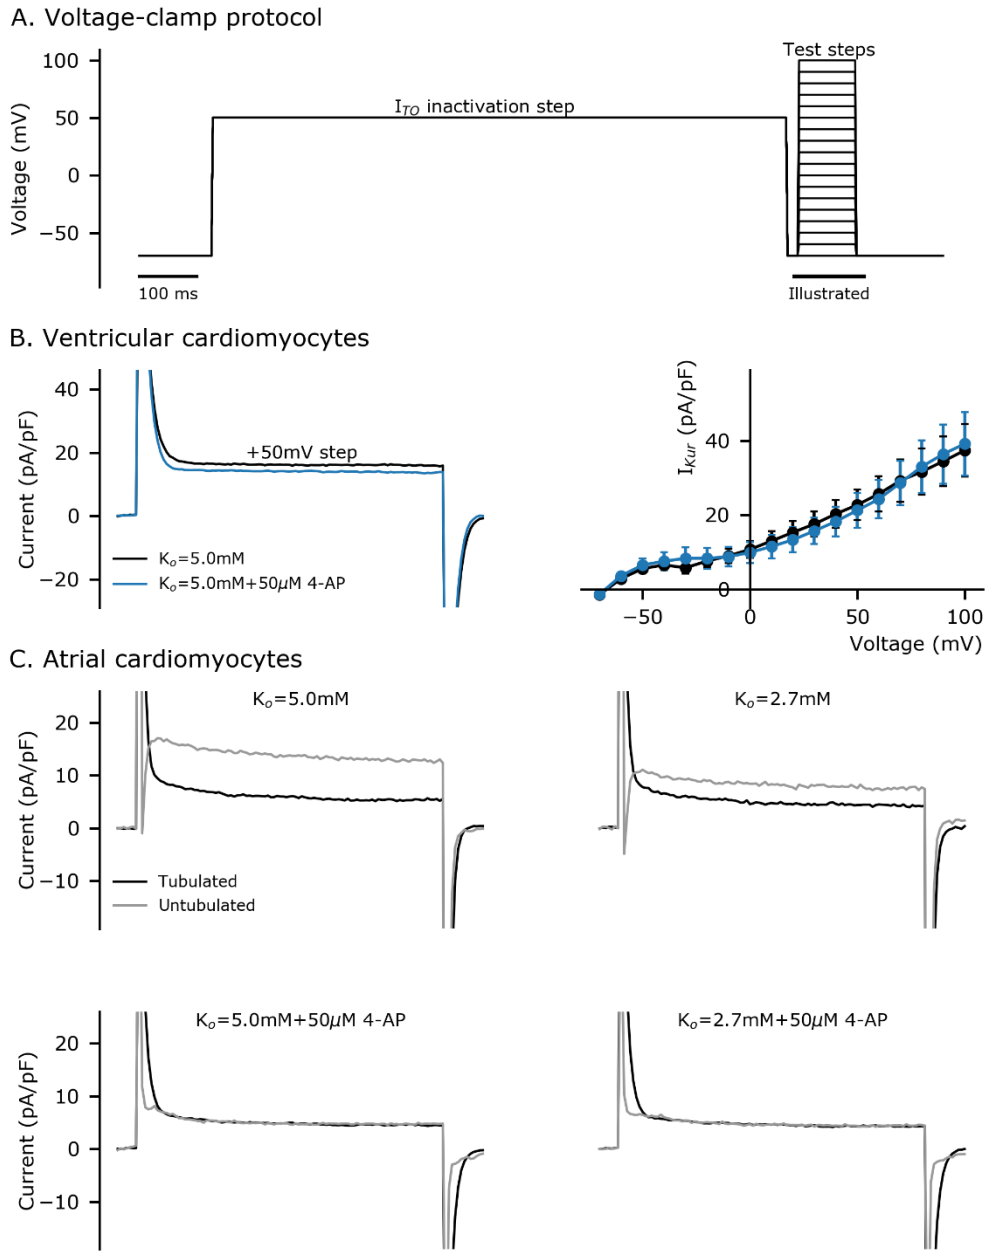

**Online Figure III. Recording of ultra-rapid  $K^+$  current ( $I_{Kur}$ ).**

**A.** To better isolate the  $I_{Kur}$  component of steady-state  $K^+$  current, a protocol described in <sup>22</sup> was employed to inactivate  $I_{TO}$ . Inactivation was accomplished with a 1 s voltage step from -70 mV to +50 mV, prior to 100 ms test steps from -70 mV to a range of potentials. **B.** When the protocol was employed in ventricular cells, end-of-pulse currents did not include  $I_{Kur}$ , as evidenced by a lack of effect of 50  $\mu$ mol/L 4-AP.  $n = 18$ , 7 from 10, 6 hearts in  $K_o = 5.0$ ,  $K_o = 5.0 + 4\text{-AP}$ . **C.** Untubulated atrial myocytes exhibited larger end-of-pulse currents than tubulated cells, and 4-AP treatment revealed that this difference was due to the presence of  $I_{Kur}$  (see Fig. 7G for mean data). **Statistics.** Panel B: two-way ANOVA; no significant difference in means ( $p = 0.981$ ), and no interaction with voltage ( $p = 1.000$ ).

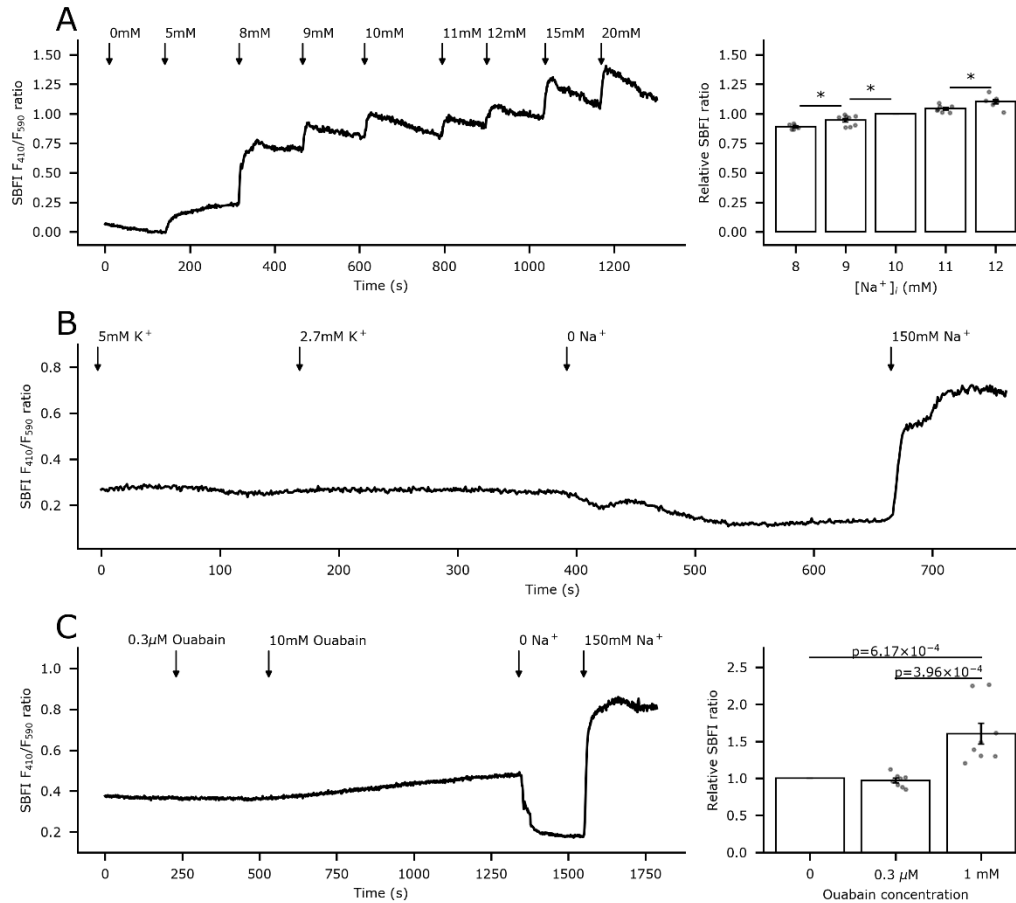

**Online Figure IV. Assessment of intracellular [Na<sup>+</sup>] by SBF1.** Intracellular [Na<sup>+</sup>] was recorded in cardiomyocytes incubated with SBF1 AM. **A.** To establish the sensitivity of this technique, rat ventricular cardiomyocytes treated with ionophores (see methods) were perfused with solutions containing progressively increasing Na<sup>+</sup> concentrations in the physiological range. Resulting stepwise and significant increases in SBF1 ratio demonstrated a minimum detection threshold of 1 mM Na<sup>+</sup> in the physiological range ( $n_{\text{cells}}=7$  from 4 hearts; data normalized to 10 mM Na<sup>+</sup>). **B.** In field-stimulated cardiomyocytes, SBF1 ratios were recorded during simulated hypokalemia, with reduction of extracellular [K<sup>+</sup>] from 5.0 to 2.7 mmol/L. A representative ventricular myocyte is illustrated, with subsequent permeabilization and exposure to 0 and saturating 150 mmol/L Na<sup>+</sup>. Mean data are presented in Figure 4B. **C.** SBF1 ratio was significantly increased during treatment with high-dose (1 mmol/L) but not low-dose (0.3 μmol/L) ouabain ( $n_{\text{cells}}=8$  from 3 hearts). **Statistics.** Panel A: one-way repeated measures ANOVA with Bonferroni correction; difference in means:  $p=2.49 \times 10^{-10}$ ; see Online Table VII for full results. Panel C: one-way repeated measures ANOVA; difference in means:  $p=2.49 \times 10^{-10}$ . \* =  $p < 0.05$ .

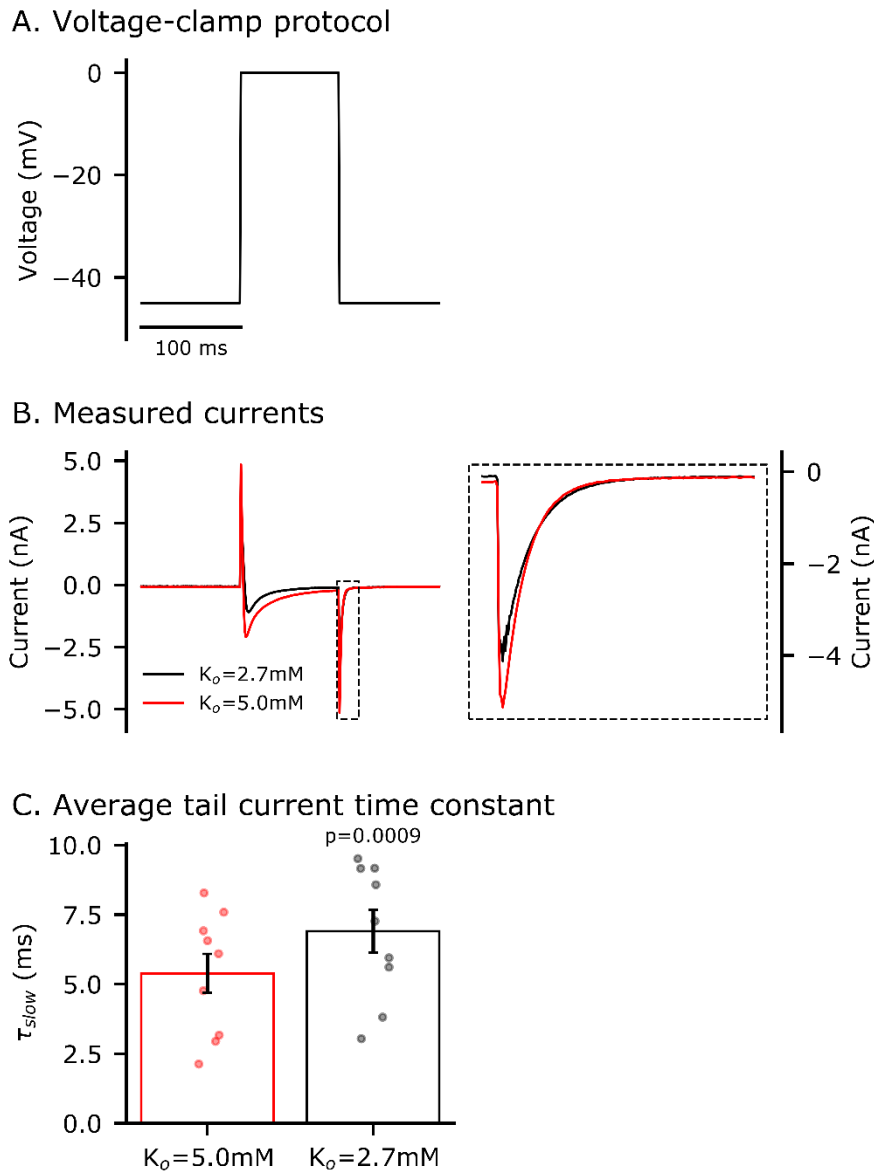

**Online Figure V. Hypokalemia slows  $\text{Ca}^{2+}$  removal by NCX in ventricular myocytes.** Changes in NCX activity during hypokalemia were assessed in patch-clamped ventricular myocytes. A voltage step from  $-45$  to  $0$  mV (**A**) was used to elicit L-type  $\text{Ca}^{2+}$  current (**B**), as described in <sup>6</sup>. The tail current triggered by repolarization to the holding potential (enlarged in right panel of **B**) was used to assess NCX current.<sup>48</sup> Reduced magnitude of L-type  $\text{Ca}^{2+}$  current during hypokalemia (see also <sup>6</sup>) was matched by reduced magnitude of the repolarizing tail current. Double exponential fits of the tail current further revealed an increase in the second time constant ( $\tau_{slow}$ , **C**), consistent with slowed NCX-mediated  $\text{Ca}^{2+}$  extrusion during hypokalemia.  $n_{\text{cells}} = 9$  from 6 hearts. **Statistics:** paired t-test.

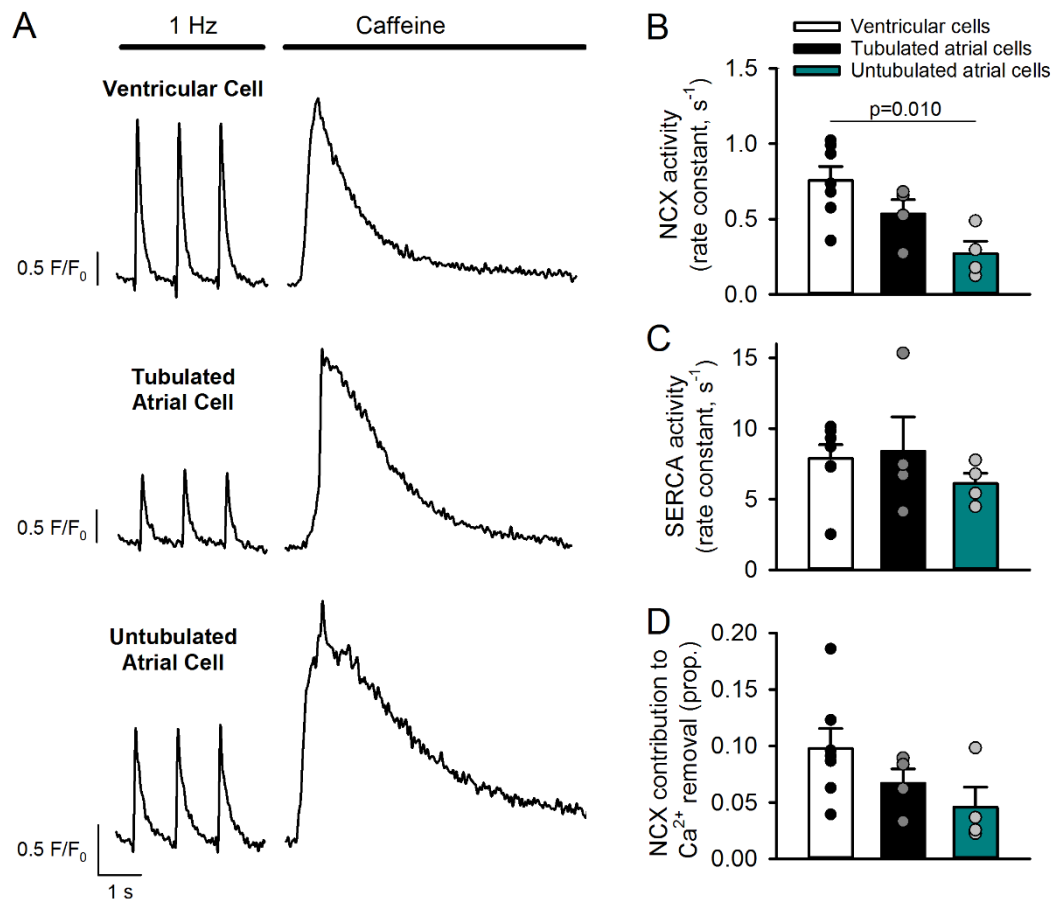

### Online Figure VI. Assessment of SR Ca<sup>2+</sup> content and Ca<sup>2+</sup> fluxes.

**A.** SR content was assessed by rapidly applying 10 mmol/L caffeine, after steady-state electrical pacing at 1 Hz. **B.** NCX activity was estimated by fitting the decay of the caffeine-elicited Ca<sup>2+</sup> transient, to obtain a rate constant (1/Tau). **C.** SERCA activity was calculated as the difference in rate constant measured during the decay of the caffeine and 1 Hz transients.<sup>49</sup> **D.** The proportional NCX contribution to Ca<sup>2+</sup> decay was assessed by comparing the SERCA rate constant to the overall rate of Ca<sup>2+</sup> extrusion during 1 Hz pacing.  $n_{\text{cells}} = 7, 4, 4$ ;  $n_{\text{hearts}} = 4, 4, 4$  hearts in ventricular, tubulated atrial, untubulated atrial cells. **Statistics:** one-way ANOVA with Bonferroni correction. Difference in means:  $p = 0.011, 0.559, 0.141$  in Panels A, B, and C, respectively.



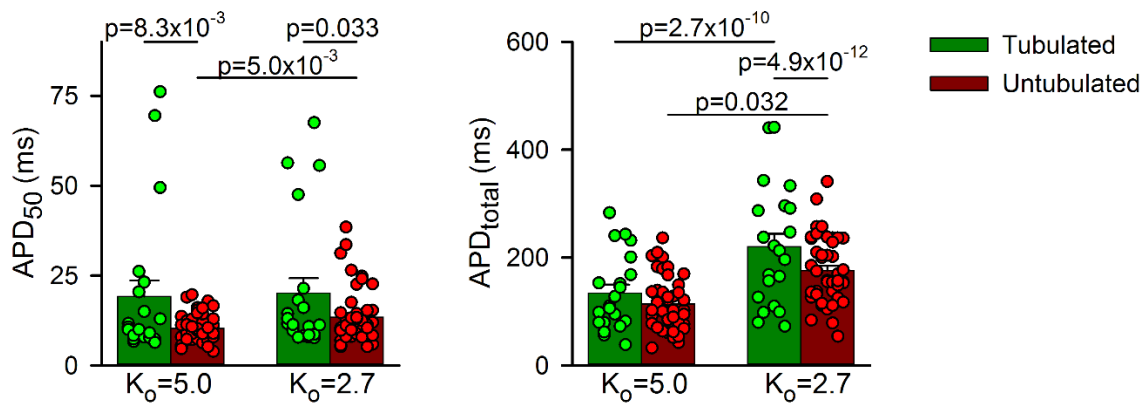

**Online Figure VII. Assessment of AP configuration in atrial cardiomyocytes.**

Mean AP duration at 50% repolarization (APD<sub>50</sub>) and at full length (APD<sub>total</sub>, measured at repolarization to 5 mV above resting membrane potential). APD<sub>75</sub> measurements are presented in Figure 7D. **Statistics:** Two-way repeated measures ANOVA with Bonferroni correction. Difference in means for APD<sub>50</sub>: p=0.0134 for tubulated vs untubulated, p=0.0302 for K<sub>o</sub>=5.0 vs K<sub>o</sub>=2.7. Difference in means for APD<sub>total</sub>: p=0.0698 for tubulated vs untubulated, p=1.32×10<sup>-15</sup> for K<sub>o</sub>=5.0 vs K<sub>o</sub>=2.7. Tubulated cells = 21 from 12 hearts, untubulated cells = 48 from 20 hearts.

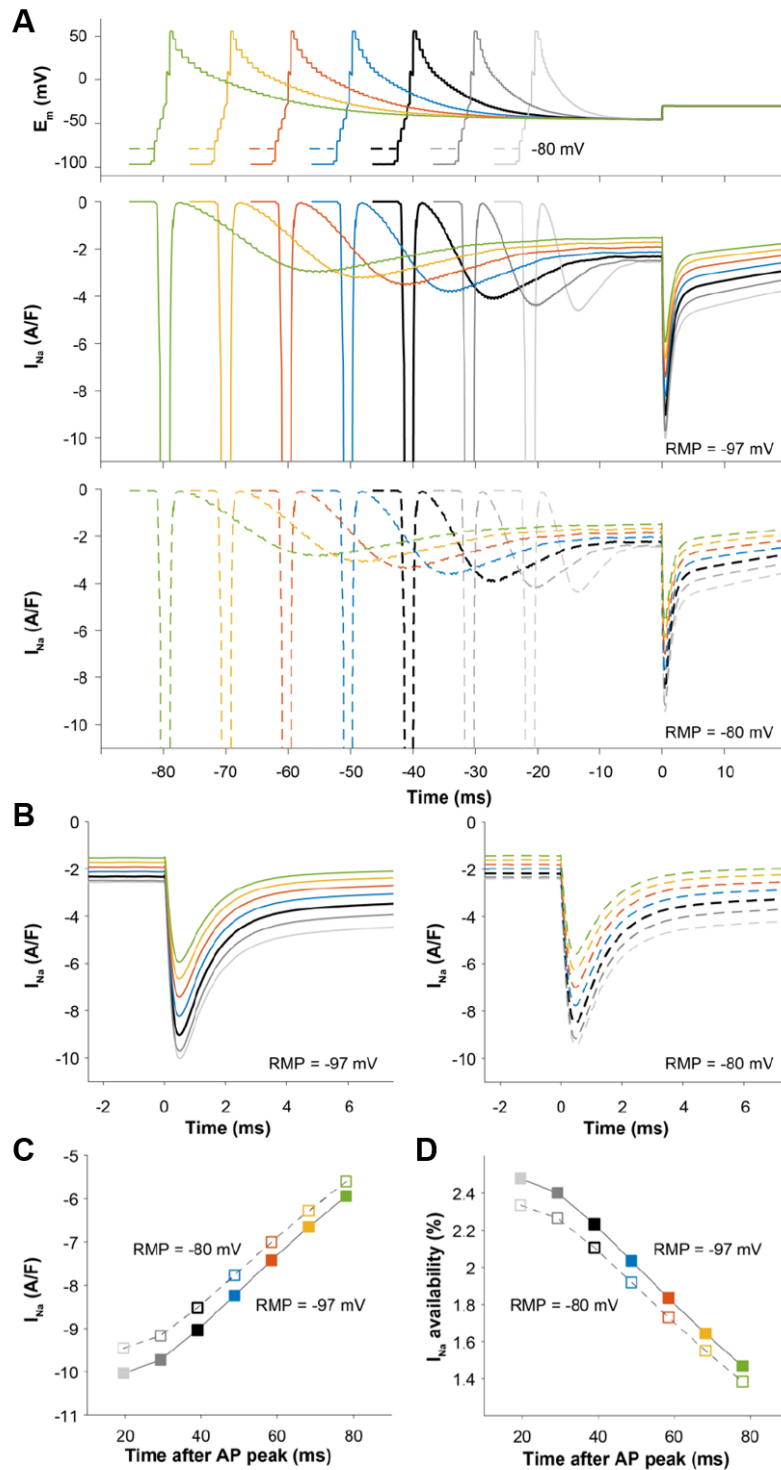

**Online Figure VIII. Assessment of  $Na^+$  current available to drive phase-3 EADs.**

Inclusion of AP waveforms from an untubulated atrial myocyte in a mathematical model of the human atrial cardiomyocyte linked phase-3 EADs to reactivation of non-equilibrium  $Na^+$  current (Figure 7I). **A.** To estimate the  $I_{Na}$  available before the onset of these events, the AP clamp was interrupted at the EAD take-off potential, i.e. the point where  $dV/dt = 0$ , and a voltage step to -30 mV was applied to elicit maximal current. To examine the role of AP duration, the rate of membrane repolarization was accelerated or slowed in a stepwise manner relative to the experimental recording (black line). The influence of membrane

hyperpolarization during hypokalemia, which decreased resting membrane potential from -80 to -97 mV, was assessed by comparing with simulations where this change was offset (dotted lines). **B.** Enlarged tracings of the triggered currents. **C.** Peak current measurements. **D.**  $I_{Na}$  values normalized to the current elicited when the voltage step was applied from the resting membrane potential, to obtain the current fraction available at this stage of repolarization. For the representative AP recording employed (black lines and dot), available  $I_{Na}$  was  $\approx 2.2\%$  of total current. As the repolarization was slowed,  $I_{Na}$  availability steadily declined. In the absence of membrane hyperpolarization during hypokalemia,  $I_{Na}$  availability was lower at all AP durations tested.

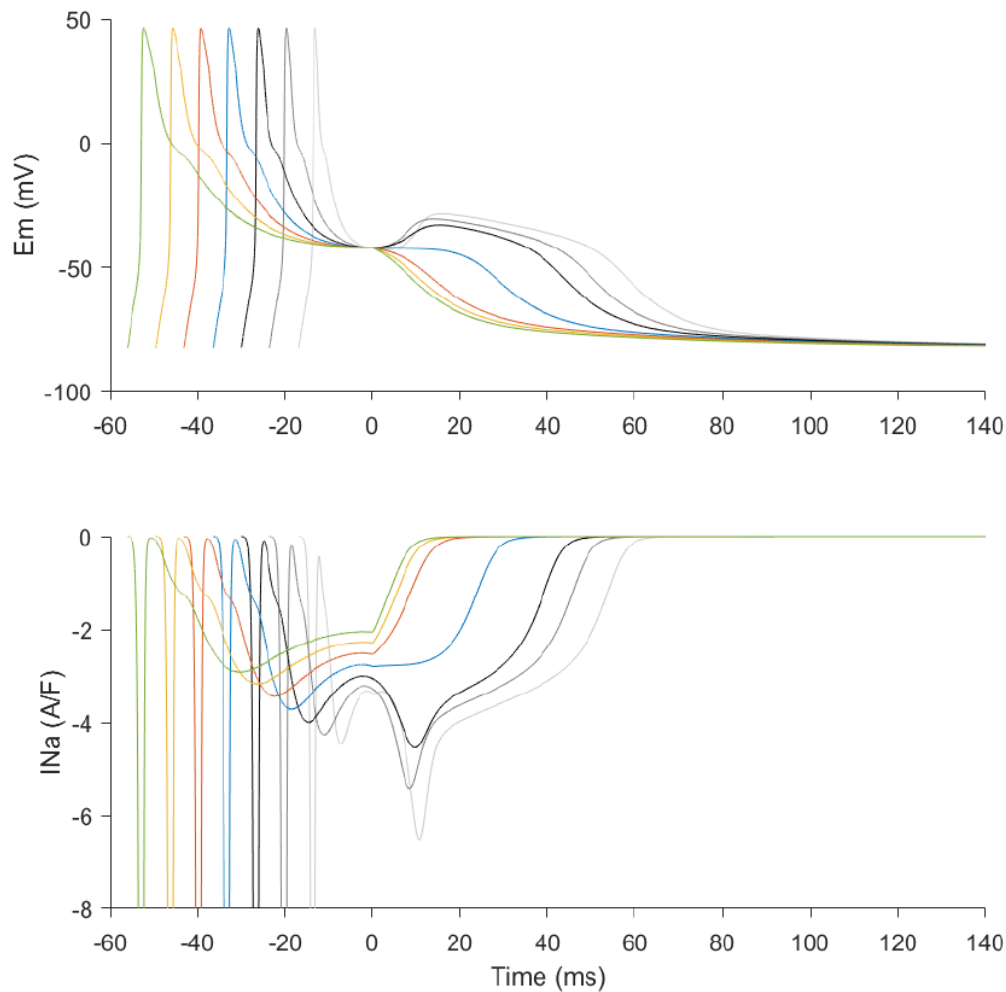

**Online Figure IX.  $I_{Na}$ -dependent phase-3 EADs require brief action potential configuration.** We employed a representative human atrial AP trace modeled in previous work<sup>14</sup> as a voltage-clamp stimulus, until the point of repolarization where  $dV/dt = 0$ . When the voltage stimulus was halted, the baseline AP configuration (black line) developed an  $I_{Na}$ -dependent EAD. Shortening the AP voltage command induced larger  $I_{Na}$  and EADs, while lengthening the AP inhibited  $I_{Na}$  reactivation and EAD generation. An  $I_{Na}$ -driven EAD required that the time from the AP peak to the take-off potential was less than  $\approx 30$  ms.

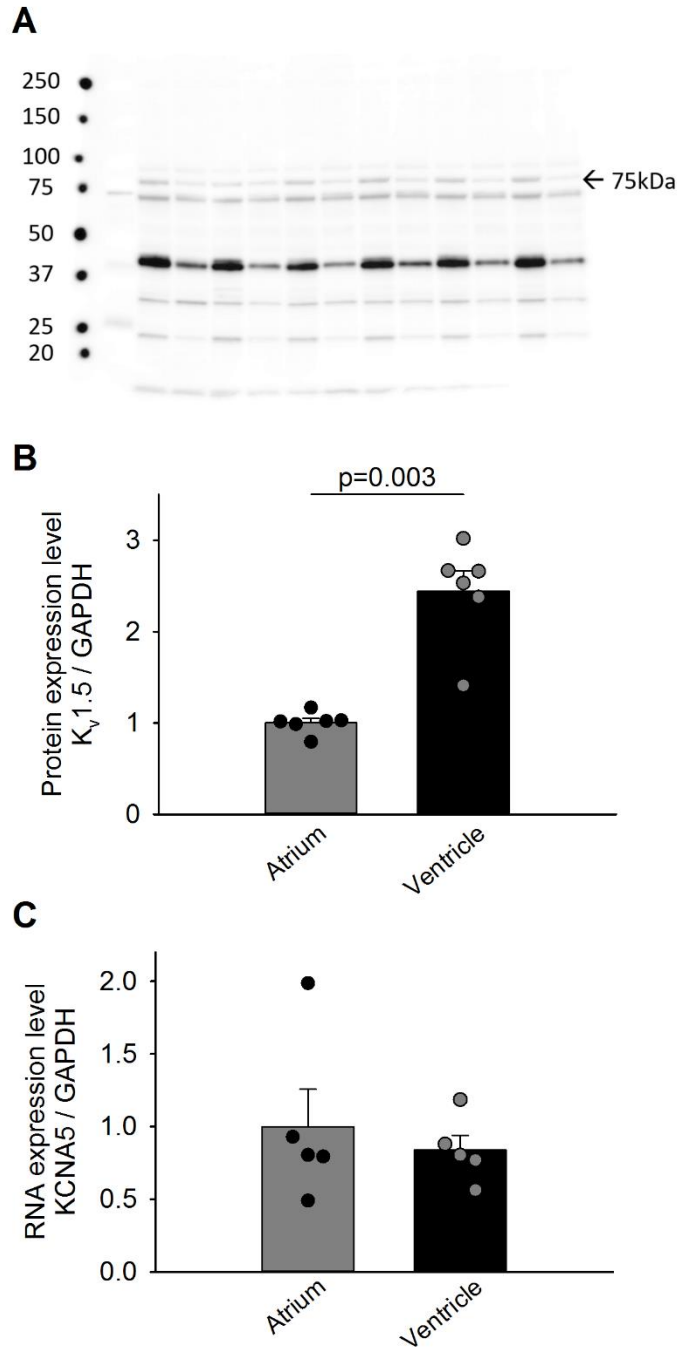

**Online Figure X. Expression of  $K_v1.5$  /  $KCNA5$  in rat ventricle and atrium.**

**A.** Western blotting performed on homogenates of rat left atria and left ventricles showed robust expression of  $K_v1.5$ , the channel linked to  $I_{Kur}$ . Lanes are alternating ventricle and atria, from left. **B.** Quantification of band density at 75 kDa and normalization to atrial values ( $n_{\text{hearts}} = 6$ ). **C.** qPCR analysis of  $KCNA5$ , the gene encoding  $K_v1.5$ , revealed similar RNA levels in right atrium and left ventricle ( $n_{\text{hearts}} = 5$ ). **Statistics:** paired t-test.

## ONLINE TABLES

|                     | Ventricular vs<br>tub atrial cells | Ventricular vs<br>untub atrial cells | Tub vs<br>untub atrial cells |
|---------------------|------------------------------------|--------------------------------------|------------------------------|
| Difference in means | * 4.41E-7                          | * 2.18E-12                           | 0.385                        |
| Within -110 mV      | 1.000                              | 1.000                                | 1.000                        |
| -100 mV             | 0.785                              | 0.933                                | 1.000                        |
| -90 mV              | 0.580                              | 0.530                                | 1.000                        |
| -80 mV              | 0.479                              | 0.401                                | 1.000                        |
| -70 mV              | 0.251                              | 0.327                                | 1.000                        |
| -60 mV              | 0.201                              | 0.285                                | 1.000                        |
| -50 mV              | 0.188                              | 0.268                                | 1.000                        |
| -40 mV              | 0.136                              | 0.236                                | 1.000                        |
| -30 mV              | 0.137                              | 0.246                                | 1.000                        |
| -20 mV              | 0.178                              | 0.418                                | 1.000                        |
| -10 mV              | 0.150                              | 0.447                                | 1.000                        |
| 0 mV                | 0.170                              | 0.400                                | 1.000                        |
| 10 mV               | 0.137                              | 0.367                                | 1.000                        |
| 20 mV               | 0.105                              | 0.296                                | 1.000                        |
| 30 mV               | 0.0807                             | 0.242                                | 1.000                        |
| 40 mV               | 0.0765                             | 0.221                                | 1.000                        |

**Online Table I. Statistical test results (p values) from comparisons of NKA current in ventricular and atrial myocytes (two-way ANOVA).** There was no significant interaction with voltage ( $p=0.682$ ). Mean data  $\pm$  SE are presented in Online Figure IC. \* =  $p < 0.05$ .

| Test                   | $K_o=5.0$ vs $2.7$ mM<br>within ventricular cells | $K_o=5.0$ vs $2.7$ mM<br>within tub atrial cells | $K_o=5.0$ vs $2.7$ mM<br>within untub atrial cells |
|------------------------|---------------------------------------------------|--------------------------------------------------|----------------------------------------------------|
|                        | Two-way RM ANOVA                                  | Two-way RM ANOVA                                 | Two-way RM ANOVA                                   |
| Difference in means    | * 0.0231                                          | * 8.49E-04                                       | * 8.34E-03                                         |
| Interaction w/ voltage | 0.997                                             | 1.000                                            | 0.847                                              |
| Within -110 mV         | * 0.0500                                          | 0.113                                            | 0.256                                              |
| -100 mV                | 0.0504                                            | 0.0608                                           | 0.178                                              |
| -90 mV                 | * 0.0396                                          | * 0.0165                                         | 0.359                                              |
| -80 mV                 | 0.0516                                            | * 0.0388                                         | 0.103                                              |
| -70 mV                 | * 0.0414                                          | 0.0633                                           | 0.178                                              |
| -60 mV                 | * 0.0257                                          | 0.0519                                           | 0.166                                              |
| -50 mV                 | * 0.0226                                          | * 0.0181                                         | * 0.0349                                           |
| -40 mV                 | * 0.0174                                          | * 0.0280                                         | * 0.0268                                           |
| -30 mV                 | * 0.0180                                          | * 0.0137                                         | * 0.0235                                           |
| -20 mV                 | * 0.0199                                          | * 5.45E-03                                       | * 4.83E-03                                         |
| -10 mV                 | * 0.0245                                          | * 0.0445                                         | * 9.84E-03                                         |
| 0 mV                   | * 0.0222                                          | * 0.0340                                         | * 6.28 E-03                                        |
| 10 mV                  | * 0.0145                                          | 0.0970                                           | * 9.21 E-03                                        |
| 20 mV                  | * 0.0246                                          | 0.155                                            | * 0.0190                                           |
| 30 mV                  | * 0.0232                                          | 0.124                                            | * 0.0220                                           |
| 40 mV                  | * 0.0436                                          | 0.142                                            | * 0.0445                                           |

**Online Table II. Statistical test results (p values) from measurements of NKA current density.** Mean data  $\pm$  SE are presented in Figure 4A. \* =  $p < 0.05$ .

| Test                   | K <sub>o</sub> =5.0 vs 2.7 mM<br>within ventricular cells |
|------------------------|-----------------------------------------------------------|
|                        | Two-way RM ANOVA                                          |
| Difference in means    | * 0.0102                                                  |
| Interaction w/ voltage | * 4.63E-19                                                |
| Within -120 mV         | * 4.15E-15                                                |
| -110 mV                | * 1.24E-12                                                |
| -100 mV                | * 1.13E-09                                                |
| -90 mV                 | * 2.36E-06                                                |
| -80 mV                 | * 2.38E-03                                                |
| -70 mV                 | 0.149                                                     |
| -60 mV                 | 0.849                                                     |
| -50 mV                 | 0.517                                                     |
| -40 mV                 | 0.484                                                     |
| -30 mV                 | 0.727                                                     |
| -20 mV                 | 0.874                                                     |
| -10 mV                 | 0.978                                                     |
| 0 mV                   | 0.873                                                     |
| 10 mV                  | 0.663                                                     |
| 20 mV                  | 0.469                                                     |
| 30 mV                  | 0.317                                                     |
| 40 mV                  | 0.246                                                     |
| 50 mV                  | 0.238                                                     |

**Online Table III. Statistical test results (p values) from measurements of steady-state K<sup>+</sup> current in ventricular cells.** Mean data ± SE are presented in Figure 6E. \* = p < 0.05.

| Test                   | Tub vs untub cells<br>within K <sub>o</sub> =5.0 mM | Tub vs untub cells<br>within K <sub>o</sub> =2.7 mM | K <sub>o</sub> =5.0 vs 2.7 mM<br>within tub cells | K <sub>o</sub> =5.0 vs 2.7 mM<br>within untub cells |
|------------------------|-----------------------------------------------------|-----------------------------------------------------|---------------------------------------------------|-----------------------------------------------------|
|                        | Two-way ANOVA                                       | Two-way ANOVA                                       | Two-way RM ANOVA                                  | Two-way RM ANOVA                                    |
| Difference in means    | 0.436                                               | 0.0660                                              | * 3.00E-03                                        | * 7.07E-04                                          |
| Interaction w/ voltage | * 0.0393                                            | * 5.21 E-04                                         | * 1.72E-16                                        | * 6.36E-45                                          |
| Within -120 mV         | 0.0794                                              | 0.0936                                              | * 2.15E-04                                        | * 1.62E-10                                          |
| -110 mV                | 0.171                                               | 0.243                                               | * 4.54E-04                                        | * 2.52E-09                                          |
| -100 mV                | 0.238                                               | 0.385                                               | * 0.0113                                          | * 1.59E-06                                          |
| -90 mV                 | 0.476                                               | 0.676                                               | 0.145                                             | * 2.37E-03                                          |
| -80 mV                 | 0.852                                               | 0.830                                               | 0.385                                             | 0.237                                               |
| -70 mV                 | 0.992                                               | 0.994                                               | 0.944                                             | 0.924                                               |
| -60 mV                 | 0.815                                               | 0.878                                               | 0.710                                             | 0.401                                               |
| -50 mV                 | 0.709                                               | 0.706                                               | 0.477                                             | 0.222                                               |
| -40 mV                 | 0.618                                               | 0.584                                               | 0.424                                             | 0.176                                               |
| -30 mV                 | 0.492                                               | 0.470                                               | 0.413                                             | 0.109                                               |
| -20 mV                 | 0.537                                               | 0.315                                               | 0.286                                             | 0.246                                               |
| -10 mV                 | 0.419                                               | 0.206                                               | 0.318                                             | 0.251                                               |
| 0 mV                   | 0.345                                               | 0.156                                               | 0.329                                             | 0.211                                               |
| 10 mV                  | 0.258                                               | 0.0821                                              | 0.260                                             | 0.176                                               |
| 20 mV                  | 0.191                                               | 0.0537                                              | 0.263                                             | 0.133                                               |
| 30 mV                  | 0.106                                               | * 0.0347                                            | 0.339                                             | 0.0631                                              |
| 40 mV                  | 0.0869                                              | * 0.0146                                            | 0.226                                             | 0.0694                                              |
| 50 mV                  | 0.0546                                              | * 6.83E-03                                          | 0.148                                             | * 0.0254                                            |
| 60 mV                  | * 0.0341                                            | * 2.55E-03                                          | 0.153                                             | * 0.0267                                            |

**Online Table IV. Statistical test results (p values) from measurements of steady-state K<sup>+</sup> current in atrial cells.** Mean data ± SE are presented in Figure 7F. \* = p < 0.05.

|                        | Tub vs untub cells<br>within K <sub>o</sub> =5.0 mM | Tub vs untub cells<br>within K <sub>o</sub> =2.7 mM | K <sub>o</sub> =5.0 vs 2.7 mM<br>within tub cells | K <sub>o</sub> =5.0 vs 2.7 mM<br>within untub cells |
|------------------------|-----------------------------------------------------|-----------------------------------------------------|---------------------------------------------------|-----------------------------------------------------|
| <b>Test</b>            | Two-way ANOVA                                       | Two-way ANOVA                                       | Two-way RM ANOVA                                  | Two-way RM ANOVA                                    |
| Difference in means    | * 1.57E-10                                          | * 1.42E-65                                          | * 1.81E-03                                        | 0.468                                               |
| Interaction w/ voltage | 0.978                                               | 0.566                                               | * 3.81E-06                                        | 0.992                                               |
| <b>Within -70 mV</b>   | 0.906                                               | 0.987                                               | 0.991                                             | 0.870                                               |
| -60 mV                 | 0.896                                               | 0.813                                               | 0.519                                             | 0.849                                               |
| -50 mV                 | 0.753                                               | 0.620                                               | 0.290                                             | 0.771                                               |
| -40 mV                 | 0.534                                               | 0.470                                               | 0.332                                             | 0.732                                               |
| -30 mV                 | 0.535                                               | 0.376                                               | 0.228                                             | 0.829                                               |
| -20 mV                 | 0.357                                               | 0.320                                               | 0.202                                             | 0.592                                               |
| -10 mV                 | 0.343                                               | 0.326                                               | 0.186                                             | 0.532                                               |
| 0 mV                   | 0.220                                               | 0.207                                               | 0.165                                             | 0.526                                               |
| 10 mV                  | 0.224                                               | 0.204                                               | 0.182                                             | 0.566                                               |
| 20 mV                  | 0.148                                               | 0.123                                               | 0.177                                             | 0.622                                               |
| 30 mV                  | 0.129                                               | 0.0675                                              | 0.130                                             | 0.813                                               |
| 40 mV                  | 0.0756                                              | 0.0917                                              | 0.129                                             | 0.391                                               |
| 50 mV                  | * 0.0445                                            | 0.0770                                              | 0.0845                                            | 0.234                                               |
| 60 mV                  | 0.0971                                              | * 0.0221                                            | * 6.30E-03                                        | 0.663                                               |
| 70 mV                  | 0.0676                                              | * 0.0270                                            | * 1.38E-03                                        | 0.272                                               |
| 80 mV                  | 0.0990                                              | * 0.0167                                            | * 3.16E-04                                        | 0.423                                               |
| 90 mV                  | 0.0721                                              | * 0.0135                                            | * 1.55E-04                                        | 0.312                                               |
| 100 mV                 | 0.151                                               | * 5.17E-03                                          | * 8.32E-07                                        | 0.476                                               |
| <b>+4-AP</b>           |                                                     |                                                     |                                                   |                                                     |
| <b>Test</b>            | Two-way ANOVA                                       | Two-way ANOVA                                       | Two-way ANOVA                                     | Two-way ANOVA                                       |
| Difference in means    | 0.243                                               | * 2.95E-03                                          | * 3.88E-05                                        | 0.711                                               |
| Interaction w/ voltage | 1.000                                               | 1.000                                               | 0.995                                             | 1.000                                               |
| <b>Within -70 mV</b>   | 0.883                                               | 0.976                                               | 0.908                                             | 0.955                                               |
| -60 mV                 | 0.976                                               | 0.899                                               | 0.744                                             | 0.682                                               |
| -50 mV                 | 0.770                                               | 0.680                                               | 0.879                                             | 0.987                                               |
| -40 mV                 | 0.879                                               | 0.702                                               | 0.765                                             | 0.989                                               |
| -30 mV                 | 0.931                                               | 0.752                                               | 0.537                                             | 0.781                                               |
| -20 mV                 | 0.949                                               | 0.606                                               | 0.336                                             | 0.805                                               |
| -10 mV                 | 0.891                                               | 0.489                                               | 0.346                                             | 0.997                                               |
| 0 mV                   | 0.813                                               | 0.482                                               | 0.326                                             | 0.954                                               |
| 10 mV                  | 0.940                                               | 0.528                                               | 0.397                                             | 0.972                                               |
| 20 mV                  | 0.704                                               | 0.438                                               | 0.247                                             | 0.921                                               |
| 30 mV                  | 0.728                                               | 0.382                                               | 0.222                                             | 0.909                                               |
| 40 mV                  | 0.836                                               | 0.45                                                | 0.322                                             | 0.941                                               |
| 50 mV                  | 0.698                                               | 0.323                                               | 0.13                                              | 0.986                                               |
| 60 mV                  | 0.530                                               | 0.172                                               | * 0.0648                                          | 0.765                                               |
| 70 mV                  | 0.537                                               | 0.227                                               | 0.146                                             | 0.643                                               |
| 80 mV                  | 0.527                                               | 0.273                                               | 2.214                                             | 0.683                                               |
| 90 mV                  | 0.417                                               | 0.228                                               | 2.568                                             | 0.631                                               |
| 100 mV                 | 0.256                                               | 0.28                                                | * 0.0907                                          | 0.559                                               |

**Online Table V. Statistical test results (p values) from measurements of steady-state K<sup>+</sup> current after inhibition of I<sub>TO</sub>.** Mean data ± SE are presented in Figure 7G, top and bottom panels.

\* = p < 0.05.



| Test                   | Untubulated atrial cells | Tubulated atrial cells | Ventricular cells |
|------------------------|--------------------------|------------------------|-------------------|
|                        | Two-way ANOVA            | Two-way ANOVA          | Two-way ANOVA     |
| Difference in means    | 0.473                    | 0.176                  | 0.887             |
| Interaction w/ voltage | * 2.07E-09               | * 0.025                | 1.000             |
| Within -120 mV         | * 0.0153                 | 0.332                  | 0.989             |
| -110 mV                | 0.0647                   | 0.506                  | 0.982             |
| -100 mV                | 0.183                    | 0.651                  | 0.957             |
| -90 mV                 | 0.450                    | 0.748                  | 0.926             |
| -80 mV                 | 0.741                    | 0.853                  | 0.947             |
| -70 mV                 | 0.962                    | 0.977                  | 0.851             |
| -60 mV                 | 0.837                    | 0.917                  | 0.921             |
| -50 mV                 | 0.749                    | 0.879                  | 0.993             |
| -40 mV                 | 0.624                    | 0.835                  | 0.819             |
| -30 mV                 | 0.512                    | 0.786                  | 0.633             |
| -20 mV                 | 0.416                    | 0.712                  | 0.710             |
| -10 mV                 | 0.286                    | 0.693                  | 0.843             |
| 0 mV                   | 0.208                    | 0.636                  | 0.952             |
| 10 mV                  | 0.132                    | 0.581                  | 0.916             |
| 20 mV                  | 0.0887                   | 0.541                  | 0.807             |
| 30 mV                  | 0.0541                   | 0.451                  | 0.777             |
| 40 mV                  | * 0.0395                 | 0.393                  | 0.776             |
| 50 mV                  | * 0.0234                 | 0.299                  | 0.753             |
| 60 mV                  | * 9.23E-03               | 0.300                  | 0.695             |

**Online Table VI. Statistical test results (p values) comparing measurements of steady-state  $K^+$  currents  $\pm$  4-AP.** Mean data  $\pm$  SE are presented in Online Figure IIC. \* =  $p < 0.05$ .

|    | $[Na^+]_i$ (mM) |          |            |            |            |
|----|-----------------|----------|------------|------------|------------|
|    | 8               | 9        | 10         | 11         | 12         |
| 8  |                 | * 0.0391 | * 7.27E-07 | * 2.47E-07 | * 5.80E-10 |
| 9  |                 |          | * 0.0149   | * 1.26E-04 | * 6.18E-08 |
| 10 |                 |          |            | 0.208      | * 3.4E-05  |
| 11 |                 |          |            |            | * 0.0433   |
| 12 |                 |          |            |            |            |

**Online Table VII. Two-way repeated measures ANOVA test results (p values) comparing changes in SBFi ratio with known increases in  $[Na^+]_i$ .** Overall p value = 2.49E-10. Mean data  $\pm$  SE are presented in Online Figure IVA. \* =  $p < 0.05$ .
