# Supplementary material for: Hypokalemia Promotes Arrhythmia by Distinct Mechanisms in Atrial and Ventricular Myocytes
Source: PubMed Central journal article supplement — Circ Res. 2020 Mar 26;126(7):889–906. doi: 10.1161/CIRCRESAHA.119.315641 (PMC7098435; doi:10.1161/circresaha.119.315641), 2020-03-26
Supplement: res-126-889-s003.pdf [file res-126-889-s003.pdf]

## Major Resources Table

### Animals (in vivo studies)

| Species                  | Vendor or Source     | Background Strain | Sex  | Persistent ID / URL                                                                                                               |
|--------------------------|----------------------|-------------------|------|-----------------------------------------------------------------------------------------------------------------------------------|
| <i>Rattus norvegicus</i> | Janvier Labs, France | Hannover Wistar   | Male | <a href="https://www.janvier-labs.com/en/fiche_produit/wistar_rat/">https://www.janvier-labs.com/en/fiche_produit/wistar_rat/</a> |

### Antibodies

| Target antigen                           | Vendor or Source | Catalog # | Working concentration | Persistent ID / URL                                                                                                                                                                                                                                                                                             |
|------------------------------------------|------------------|-----------|-----------------------|-----------------------------------------------------------------------------------------------------------------------------------------------------------------------------------------------------------------------------------------------------------------------------------------------------------------|
| NCX                                      | Swant            | R3F1      | 1:100                 | <a href="https://www.swant.com/pdfs/Monoclonal_anti_Na-Ca-exchanger.pdf">https://www.swant.com/pdfs/Monoclonal_anti_Na-Ca-exchanger.pdf</a>                                                                                                                                                                     |
| NKA- $\alpha$ 1                          | Merck Millipore  | 05-369    | 1:100                 | <a href="https://www.merckmillipore.com/NO/en/product/Anti-Na+-K+-ATPase-1-Antibody-clone-C464.6,MM_NF-05-369?ReferrerURL=https%3A%2F%2Fwww.google.com%2F">https://www.merckmillipore.com/NO/en/product/Anti-Na+-K+-ATPase-1-Antibody-clone-C464.6,MM_NF-05-369?ReferrerURL=https%3A%2F%2Fwww.google.com%2F</a> |
| NKA- $\alpha$ 2                          | Merck Millipore  | 07-674    | 1:100                 | <a href="https://www.merckmillipore.com/NO/en/product/Anti-Na+K+-ATPase-2-Antibody,MM_NF-07-674">https://www.merckmillipore.com/NO/en/product/Anti-Na+K+-ATPase-2-Antibody,MM_NF-07-674</a>                                                                                                                     |
| caveolin-3                               | Abcam            | ab2912    | 1:100                 | <a href="https://www.abcam.com/caveolin-3-antibody-caveolae-marker-ab2912.html">https://www.abcam.com/caveolin-3-antibody-caveolae-marker-ab2912.html</a>                                                                                                                                                       |
| F(ab') <sub>2</sub> -Goat anti-Mouse IgG | Thermo Fisher    | A-11017   | 1:200                 | <a href="https://www.thermofisher.com/antibody/product/Goat-anti-Mouse-IgG-H-L-Cross-Adsorbed-Secondary-Antibody-Polyclonal/A-11017">https://www.thermofisher.com/antibody/product/Goat-anti-Mouse-IgG-H-L-Cross-Adsorbed-Secondary-Antibody-Polyclonal/A-11017</a>                                             |
| F(ab') <sub>2</sub> -goat anti-mouse     | Thermo Fisher    | A-11071   | 1:200                 | <a href="https://www.thermofisher.com/antibody/product/Goat-anti-Rabbit-IgG-H-L-Cross-Adsorbed-Secondary-Antibody-Polyclonal/A-11071">https://www.thermofisher.com/antibody/product/Goat-anti-Rabbit-IgG-H-L-Cross-Adsorbed-Secondary-Antibody-Polyclonal/A-11071</a>                                           |
