# Supplementary figures and images for: Hypokalemia Promotes Arrhythmia by Distinct Mechanisms in Atrial and Ventricular Myocytes
Source: PubMed Central journal article supplement — Circ Res. 2020 Mar 26;126(7):889–906. doi: 10.1161/CIRCRESAHA.119.315641 (PMC7098435; doi:10.1161/circresaha.119.315641), 2020-03-26

- 
- 
- 
- 
- 
- 
- 
- 
- 

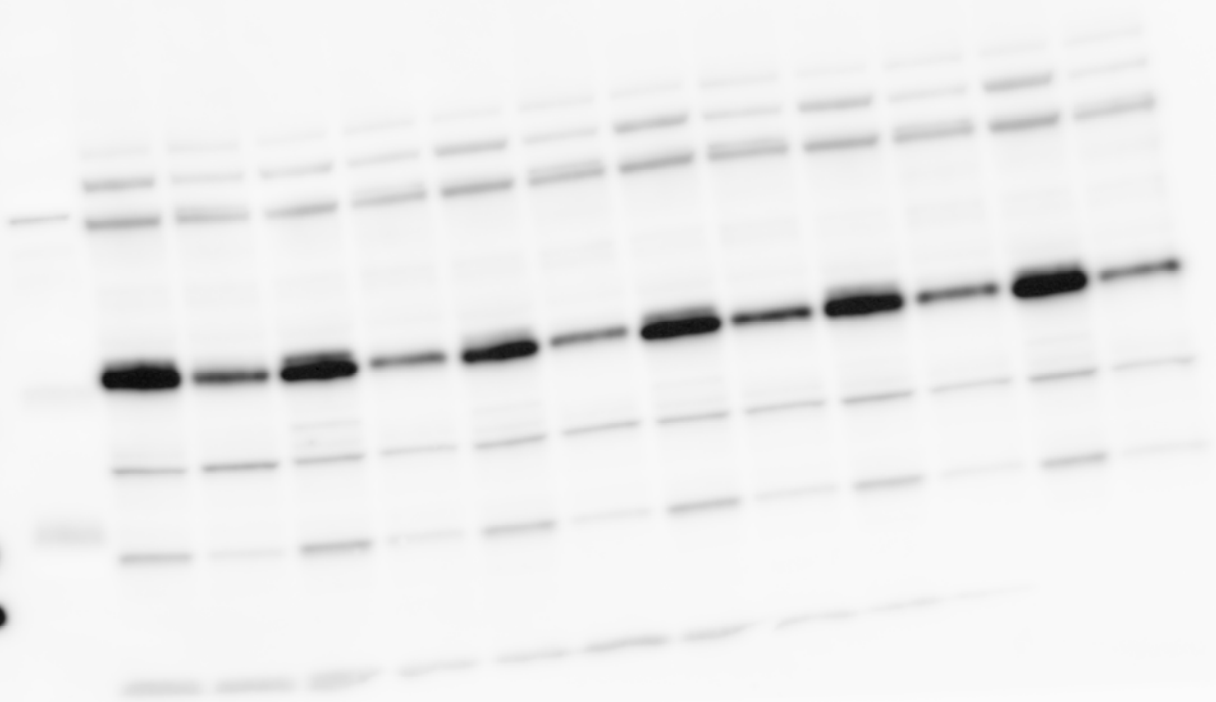

Supplement: res-126-889-s004.pdf [file res-126-889-s004.pdf]
